# Supplementary material
Source: PubMed Central journal article supplement (PMC10486818)
Supplement: media-1.pdf [file media-1.pdf]

## Supplementary Figures

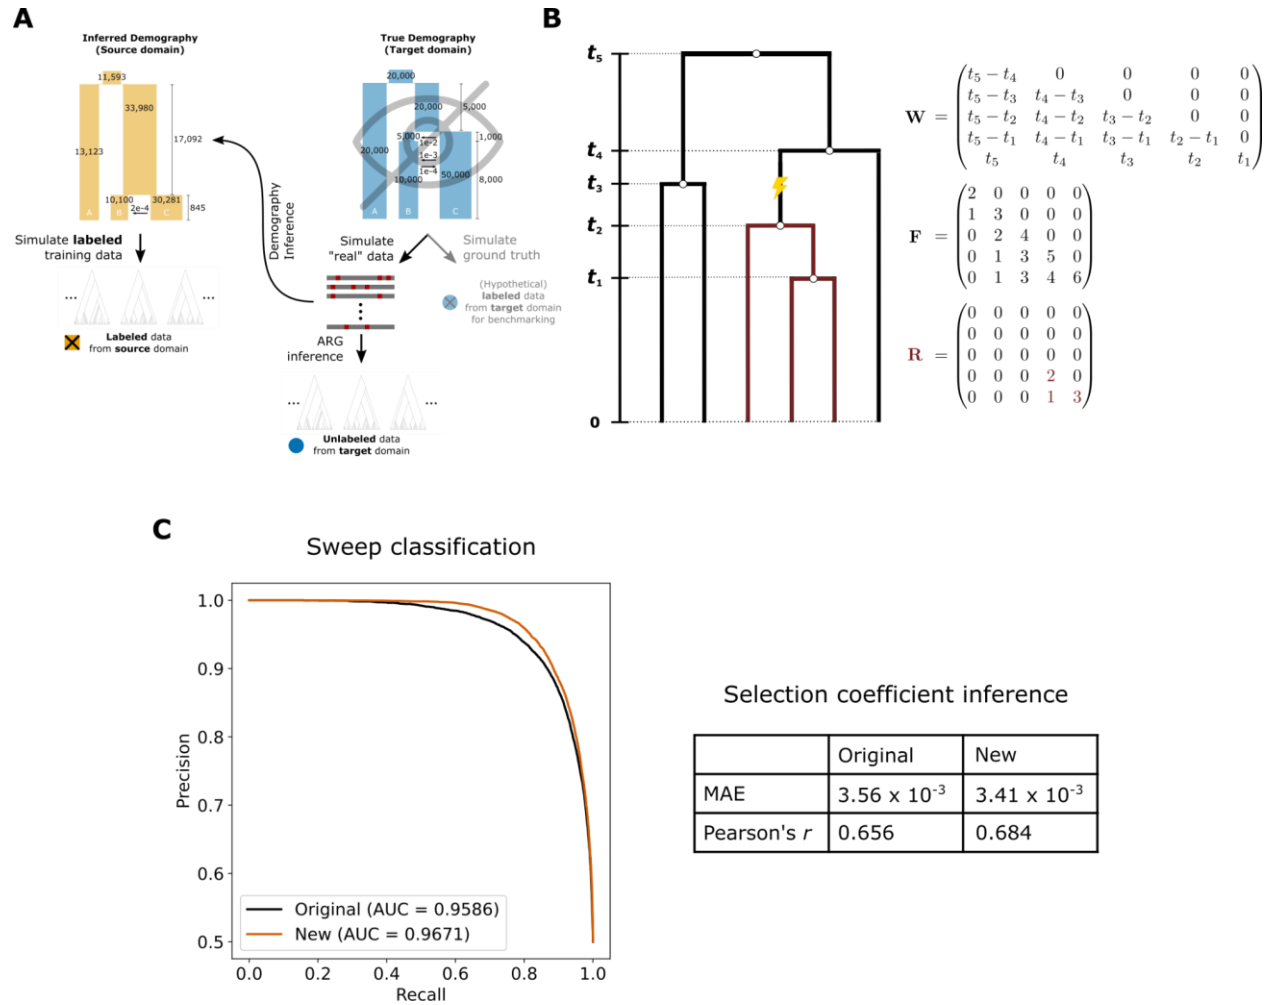

**Supplementary Figure 1. Domain-adaptive SIA. A)** The workflow of a simulation study that aims to benchmark the performance of the domain-adaptive SIA model in a realistic setting of demographic mis-specification. **B)** An improved version of SIA input features that encodes the full genealogy (adapted from [59]). A genealogy with  $n$  taxa at a polymorphic site is uniquely encoded by three  $(n-1) \times (n-1)$  lower triangular matrices. The weight matrix  $\mathbf{W}$  encodes the coalescent intervals where  $w_{ij} = t_{n-j} - t_{n-1-i}, \forall i \geq j$ , and the topology matrix  $\mathbf{F}$  encodes the number of lineages persistent in the coalescent intervals corresponding to  $\mathbf{W}$  (i.e.  $f_{ij} = \#$  of lineages between  $t_{n-j}$  and  $t_{n-1-i}, \forall i \geq j$ ). The derived lineage matrix  $\mathbf{R}$  encodes only the subtree subtending the branch where the mutation occurred (red lightning symbol), following the same scheme as  $\mathbf{F}$ . Note that the  $\mathbf{W}$  matrix is a redundant encoding of the  $n-1$  coalescent times  $(t_1, t_2, \dots, t_{n-1})$ , which contains information roughly equivalent to the original SIA input features [12]. **C)** Comparison of

the performance of the new SIA input features in **(B)** to that of the original SIA input features.

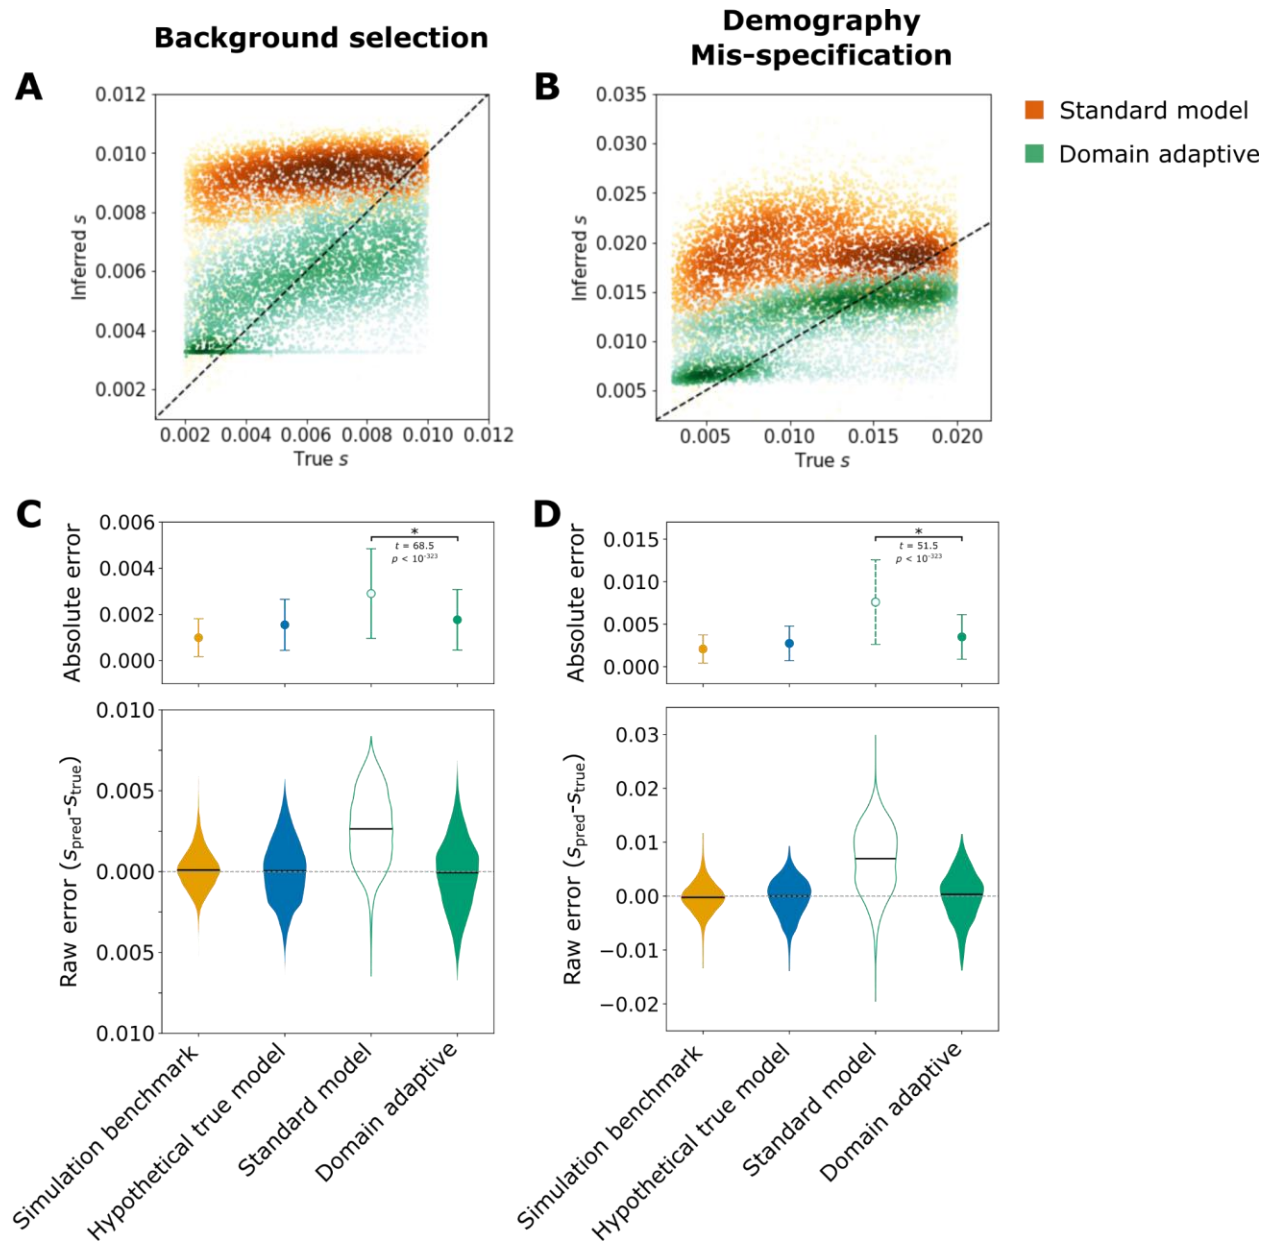

**Supplementary Figure 2. Selection coefficient inference performance of SIA models.** Raw data used to plot **Figs. 3B** and **3D** are presented in **(A)** and **(B)**, respectively. Performance of SIA models in the simulation experiment of failure to account for background selection **(C)** and in the simulation experiment of demographic model mis-specification **(D)** is presented in terms of mean and standard deviation of the absolute error (top) as well as the distribution of raw error (bottom). Statistical significance (\*) of the difference between the absolute error of the standard model and that of the domain-adaptive model is evaluated with Welch's  $t$ -test. See **Fig. 1C** for definition of the model labels.

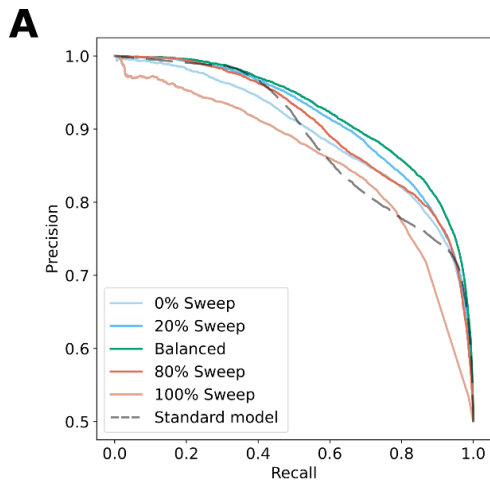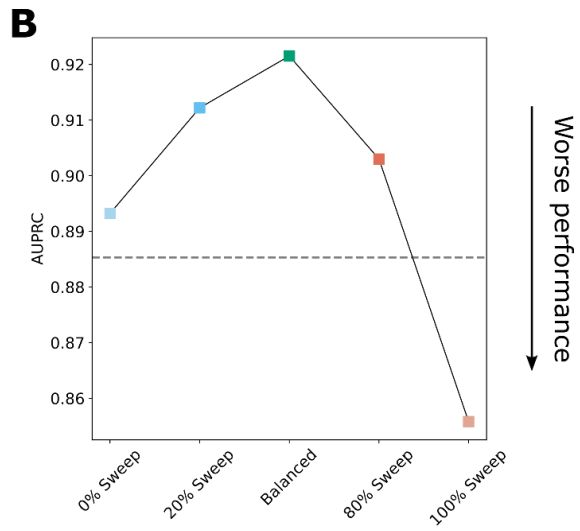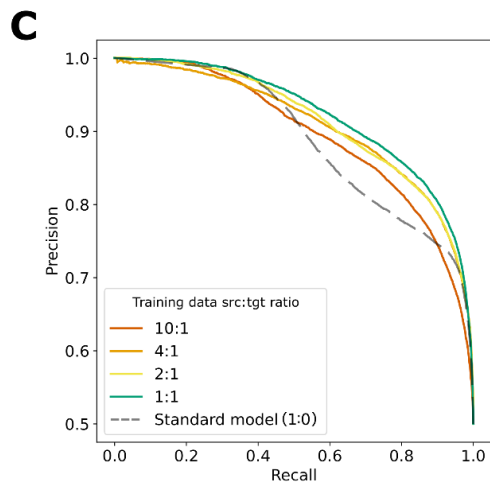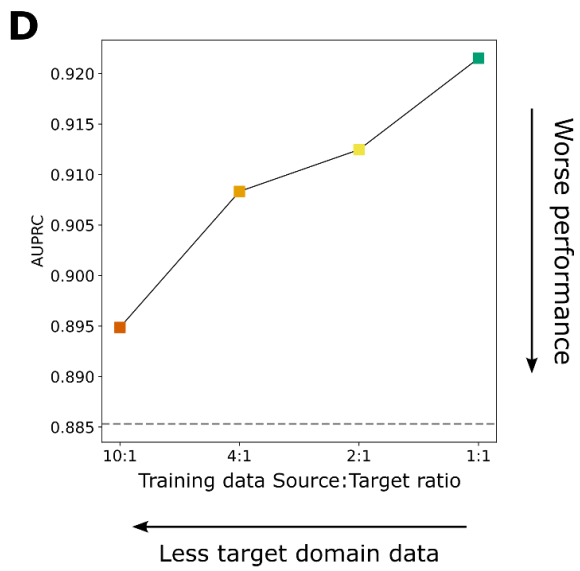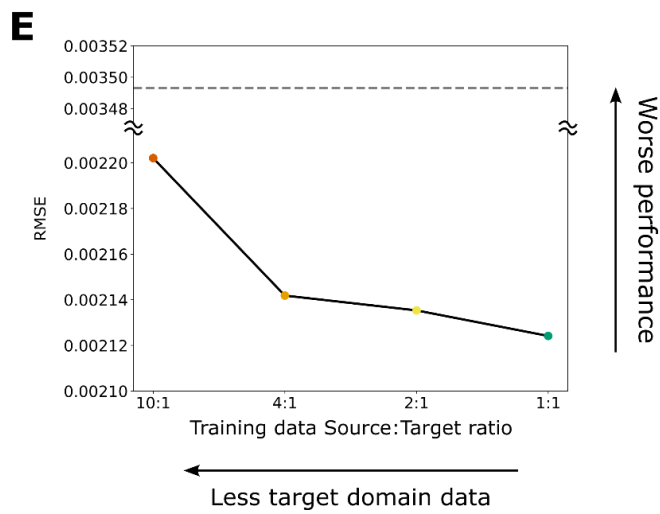

**Supplementary Figure 3. Performance of dadaSIA models trained with imbalanced data.** The sweep classification performance of dadaSIA models trained with different proportions of sweep vs. neutral examples in the target domain is shown in the form of precision-recall curves (**A**) and the area under precision-recall curve (AUPRC) (**B**). Note that the performance is always evaluated on a balanced test set. The performance of dadaSIA models trained with less target domain data than source domain data is shown in the form of precision-recall curves (**C**) and the values of AUPRC (**D**) for the classification task, and in the form of root mean squared error (RMSE) (**E**) for the selection coefficient inference task. The dashed lines in (**B**), (**D**) and (**E**) indicate performance of the standard model.

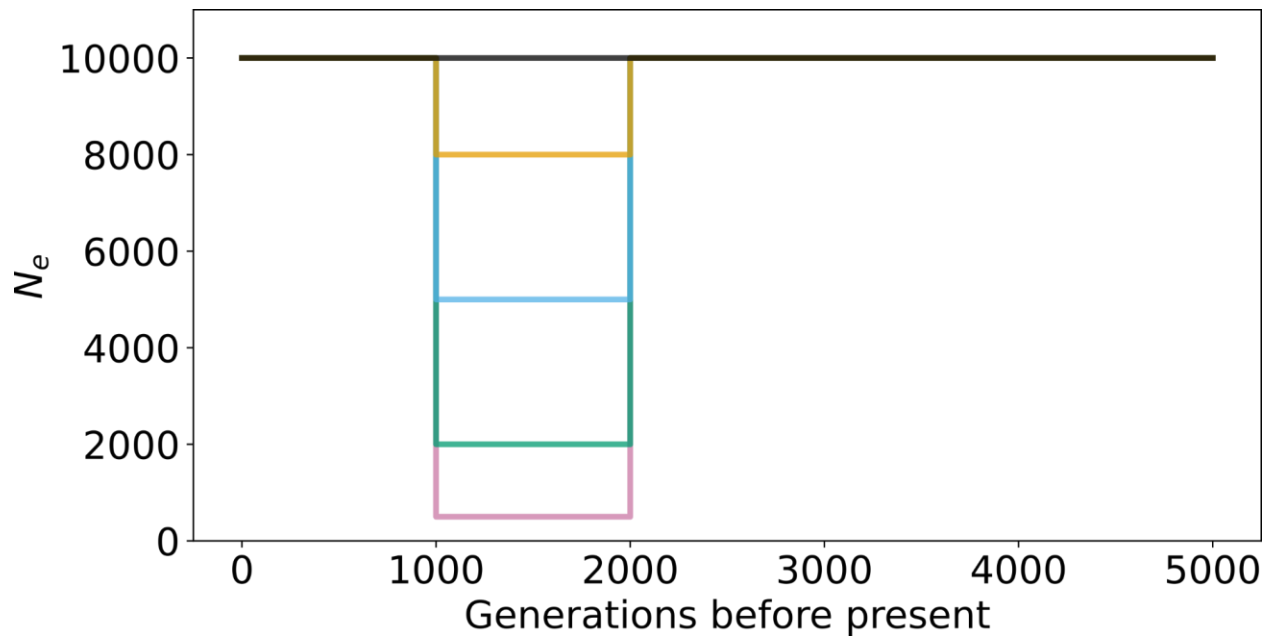

**Supplementary Figure 4. Demographic mis-specification in the form of different degrees of bottlenecks tested in Fig. 5 experiments.**

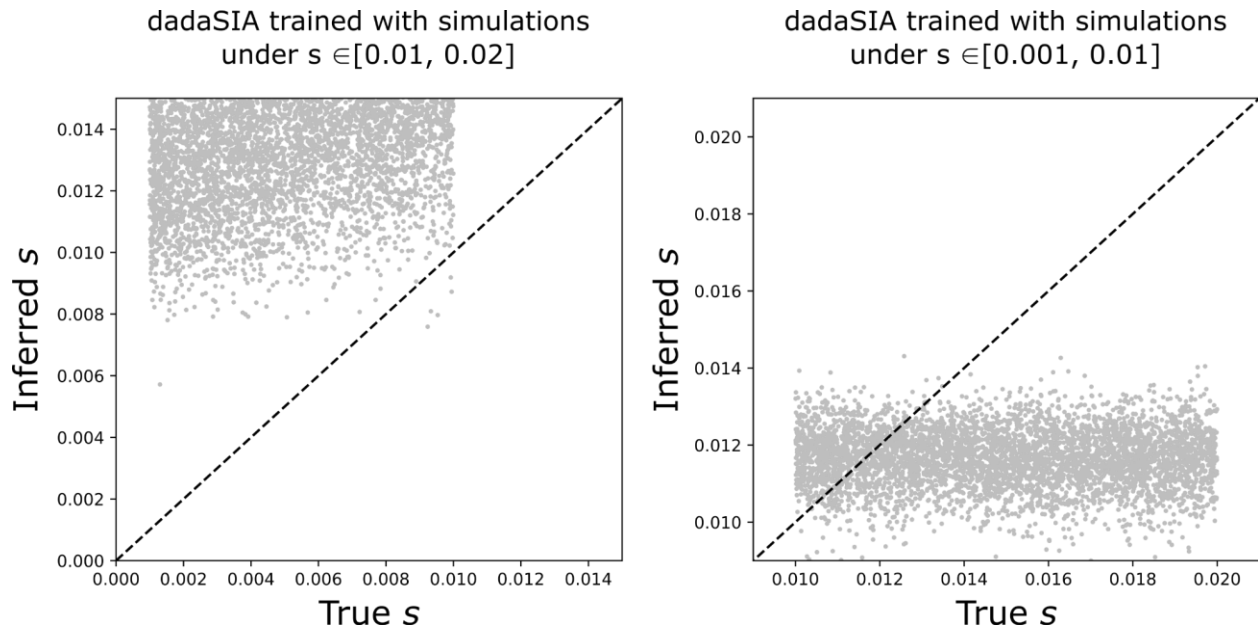

**Supplementary Figure 5. Inference of out-of-range selection coefficients in the target domain using the dadaSIA model.** The dadaSIA model trained with source domain data under  $s \in [0.01, 0.02]$  failed to meaningfully infer any value lower than 0.01, even when examples of  $s \in [0.001, 0.01]$  were supplied to the model as “unlabeled” target domain data, and vice versa.

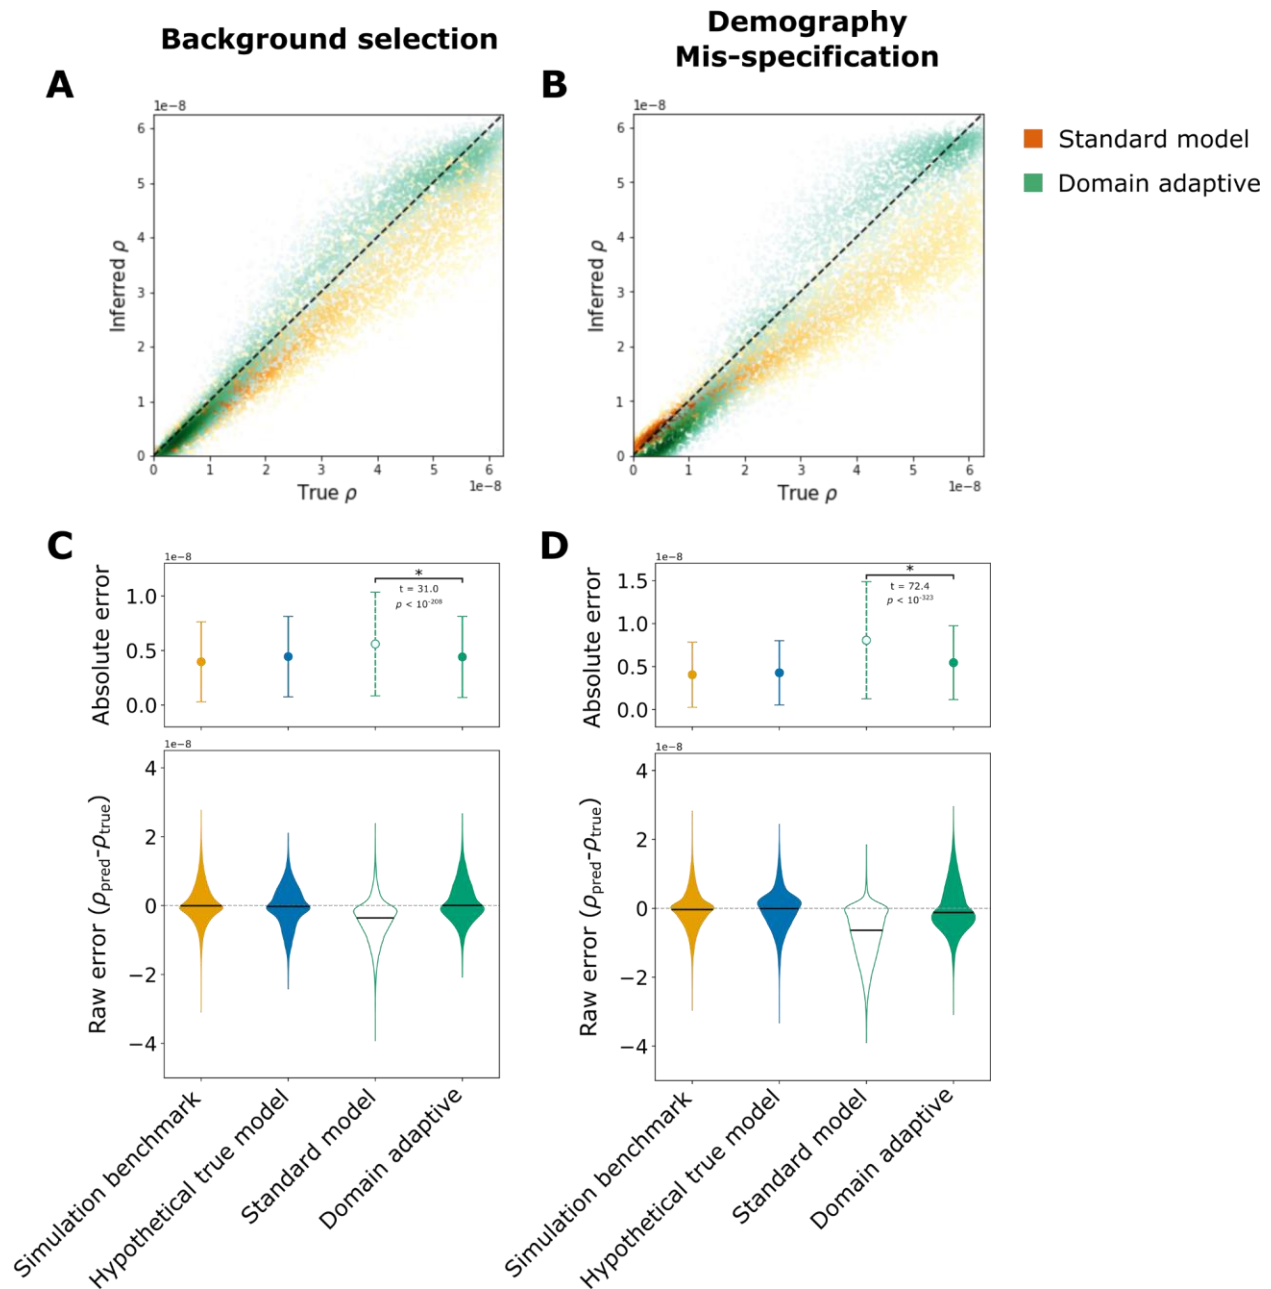

**Supplementary Figure 6. Recombination rate inference performance of ReLERNN models.** Raw data used to plot **Figs. 4A** and **4B** are presented in **(A)** and **(B)**, respectively. Performance of ReLERNN models in the simulation experiment of failure to account for background selection **(C)** and in the simulation experiment of demographic model mis-specification **(D)** is presented in terms of mean and standard deviation of the absolute error (top) as well as the distribution of raw error (bottom). Statistical significance (\*) of the difference between the absolute error of the standard model and that of the domain-adaptive model is evaluated with Welch's *t*-test. See **Fig. 1C** for definition of the model labels.



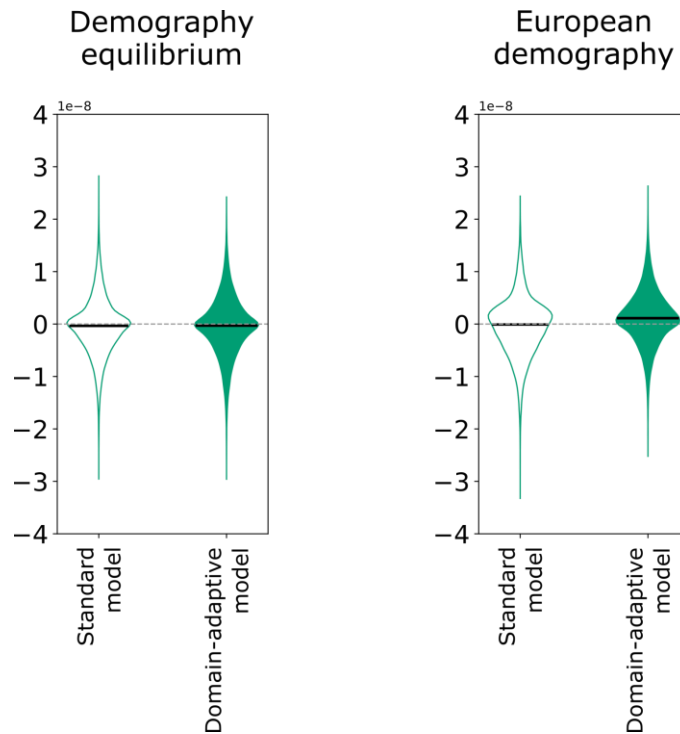

**Supplementary Figure 7. Distribution of raw error of the ReLERNN models inferring recombination rate without simulation mis-specification.** The respective mean absolute error (MAE) of the standard and domain-adaptive models are  $4.05 \times 10^{-9}$  and  $4.13 \times 10^{-9}$ , under demography equilibrium, and  $4.28 \times 10^{-9}$  and  $3.93 \times 10^{-9}$ , under a European demography. Note that the domain-adaptive model has a slight upward bias in its estimates in the case of European demography.

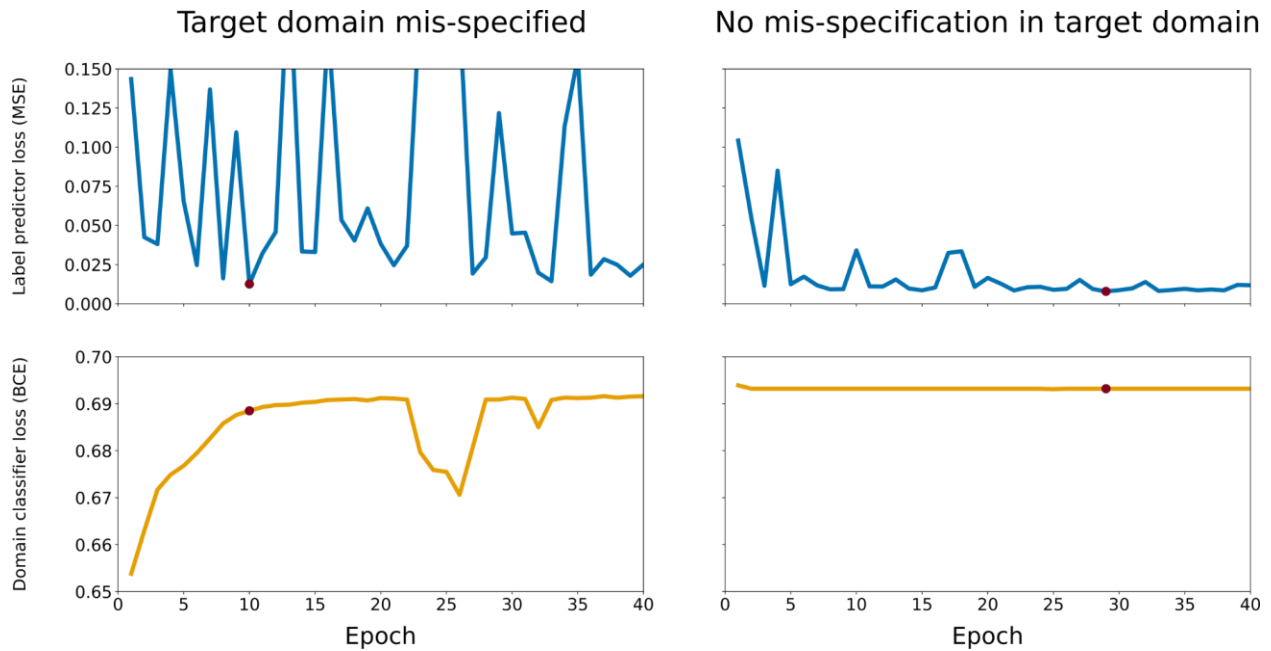

**Supplementary Figure 8. Validation loss of the label predictor branch (mean squared error) and the domain classifier branch (binary cross entropy) over training epochs.** The losses of the domain-adaptive ReLERNN models during training are plotted with and without simulation mis-specification. The red dot marks the early-stopping epoch (i.e. epoch with the lowest validation loss for the label predictor).

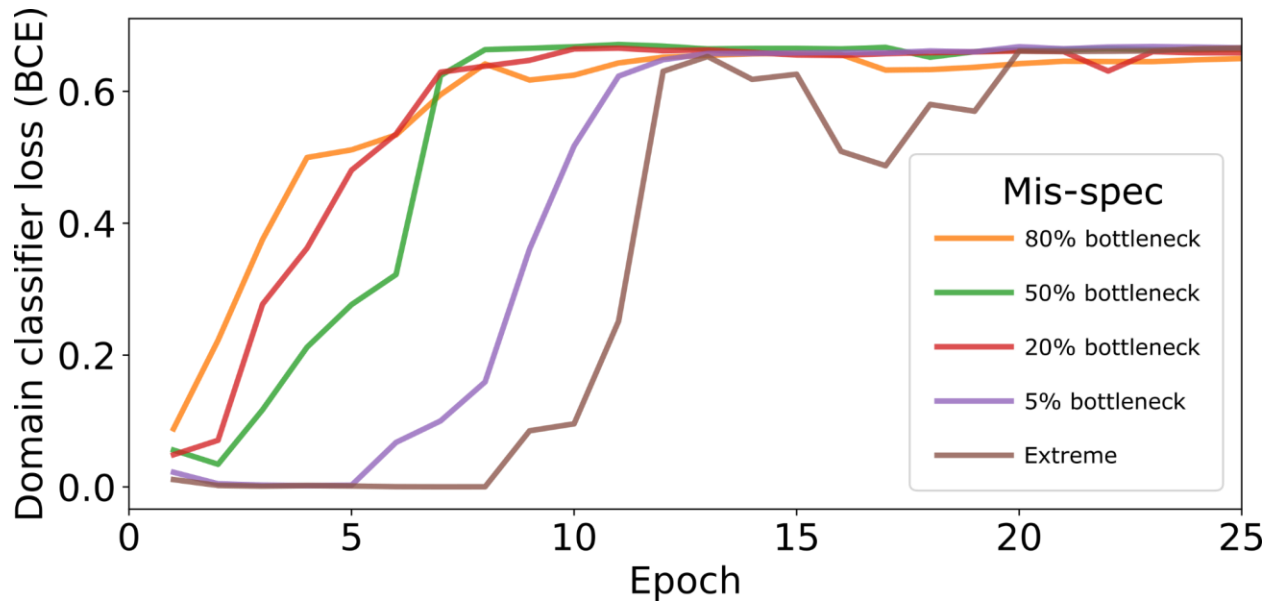

**Supplementary Figure 9. Domain classifier loss of dadaSIA models under different degrees of simulation mis-specification.** See Fig. 5 and Methods for details of the types of mis-specification.
